# Supplementary material for: An Insight into the Stages of Ion Leakage during Red Blood Cell Storage
Source: PubMed Central journal article supplement (PMC7998123; doi:10.3390/ijms22062885), 2021-03-12
Supplement: ijms-22-02885-s001.pdf [file ijms-22-02885-s001.pdf]

**Title:** An insight into the stages of ion leakage during red blood cell storage

Anna Zimna, Magdalena Kaczmarska, Ewa Szczesny-Malysiak, Aleksandra Wajda,  
Katarzyna Bulat, Fatih Celal Alcicek, Malgorzata Zygmunt, Tomasz Sacha, Katarzyna M.  
Marzec

| Cell Name         | Diameter 1 - Diameter 2 [ $\mu\text{m}$ ] | Height 1 - Height 2 [ $\mu\text{m}$ ] | Height / Diameter | Spicules |
|-------------------|-------------------------------------------|---------------------------------------|-------------------|----------|
| Discocyte         | $\leq 0.2$                                | $\leq 0.3$                            |                   | no       |
| Eliptocyte        | $\geq 1.0$                                |                                       |                   | no       |
| Codocyte          |                                           |                                       | $> 0.35$          | no       |
| Stomatocyte       | $< 1.0$                                   |                                       |                   | no       |
| Echinocyte        |                                           |                                       |                   | yes      |
| Spherocochinocyte |                                           |                                       | $> 0.35$          | yes      |
| Spherocyte        |                                           |                                       | $> 0.35$          | no       |

**Table S1.** Table with cell naming criteria used for analysis of RBCs morphological changes during 6 week storage.

| <b>Ions</b>                      | <b>Extracellular<br/>[mmol/L]</b>       | <b>Intracellular<br/>[mmol/L]</b> |
|----------------------------------|-----------------------------------------|-----------------------------------|
| [Na <sup>+</sup> ]               | 135-145                                 | 10                                |
| [Cl <sup>-</sup> ]               | 95-105                                  | 3                                 |
| [K <sup>+</sup> ]                | 3.8-5.5                                 | 159                               |
| [HCO <sub>3</sub> <sup>-</sup> ] | 22-28                                   | 7                                 |
| [H <sup>+</sup> ]                | $36 \times 10^{-6} - 44 \times 10^{-6}$ | $63 \times 10^{-6}$               |

**Table S2.** Reference ranges of extracellular and intracellular concentrations of Na<sup>+</sup>, Cl<sup>-</sup>, K<sup>+</sup>, HCO<sub>3</sub><sup>-</sup> and H<sup>+</sup> ions in human blood in adults. Zapala B. et al. Laboratory Diagnostics with Elements of Clinical Biochemistry. Book, 2017:874-886; Casey JR, et al. Nat Rev Mol Cell Biol. 2010;11(1):50-61; Rhoades R. et al. Medical Physiology : Principles for Clinical Medicine. Book 2009.

| Parameter | Unit   | Reference range |
|-----------|--------|-----------------|
| Lactates  | mmol/L | 0.6-2.2         |
| Glucose*  | mmol/L | 3.9-5.5         |
| free Fe   | μmol/L | ♂ 14-32         |
|           |        | ♀ 11-29         |
| RBC       | mln/μL | ♂ 3.91-5.11     |
|           |        | ♀ 3.91-5.61     |
| HGB       | g/dL   | ♂ 13.2-17.3     |
|           |        | ♀ 11.7-15.5     |
| HCT       | %      | ♂ 38-51         |
|           |        | ♀ 33-45         |
| MCV       | fL     | 86-98           |
| MCH       | pg     | 28-33           |
| MCHC      | g/dL   | 32-36           |

\*fasting

**Table S3.** Reference ranges of main biochemical (lactates, fasting glucose, free Fe) and morphological (RBC, HGB, HCT, MCV, MCH, MCHC) parameters in adults, with a division based on gender (♂ - males, ♀ - females) for free Fe, RBC, HGB and HCT values. Zapala B. et al. Laboratory Diagnostics with Elements of Clinical Biochemistry. Book, 2017:874-886.

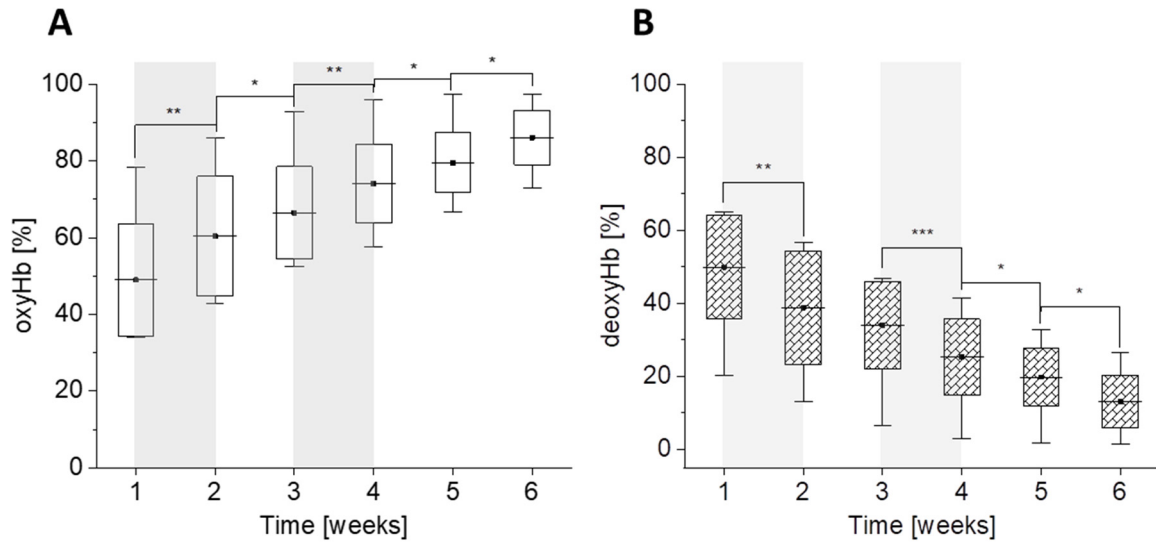

**Figure S1.** Percentage changes of the oxyHb (**A**) and deoxyHb (**B**) during storage pRBCs. The most prominent changes are marked gray. Data distribution is presented as box plots (mean value, mean  $\pm$  SD, min-max). Statistical significance of the obtained values was tested with Kruskal-Wallis ANOVA nonparametric test (null = not significant;; \* $p < 0.05$ ; \*\* $p < 0.01$ , \*\*\* $p < 0.001$ ).

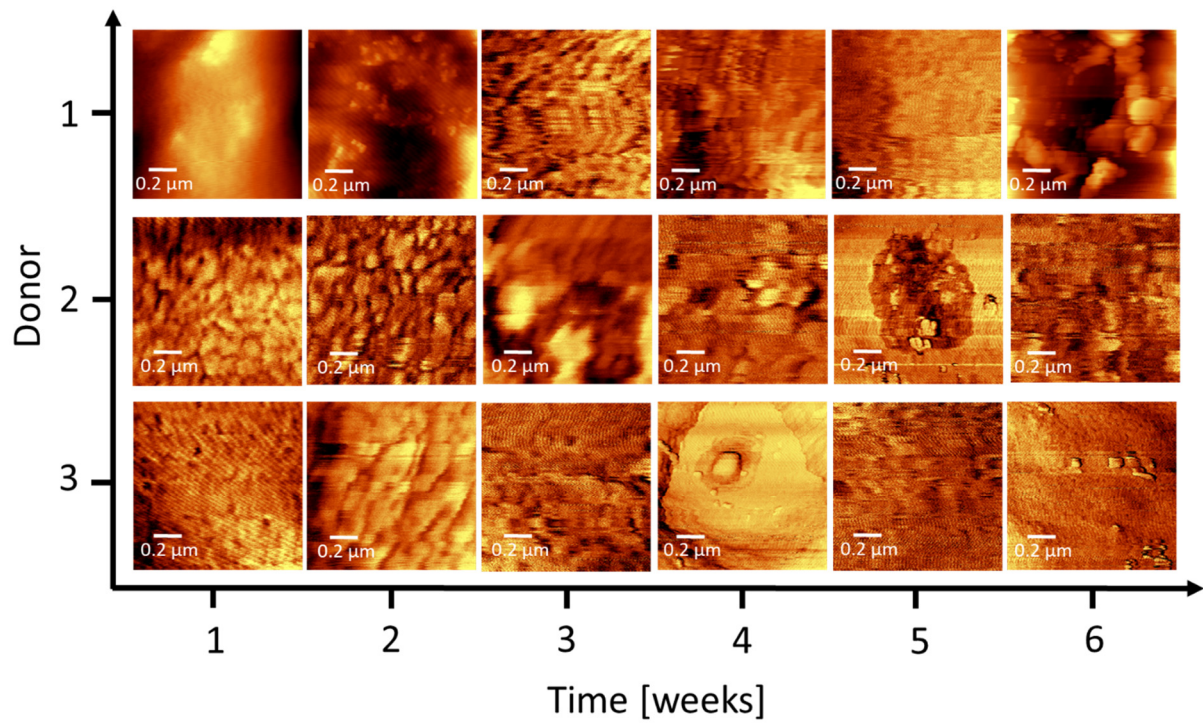

**Figure S2.** Representative nanoscale AFM images of RBCs' surface changes collected in scale  $1.5 \times 1.5 \mu\text{m}^2$  during 6 weeks storage of the pRBCs for three donors.
